# Supplementary material for: Modified enrichment and purification protocol for dissolved silicon-isotope determination in natural waters
Source: Royal Society of Chemistry journal article supplement (doi:10.1039/c4ja00122b), 2014-01-01
Supplement: c4ja00122b1.pdf [file c4ja00122b1.pdf]

**Electronic Supplementary Information (ESI) for:**

**Modified enrichment and purification protocol for dissolved silicon isotope determination in natural waters**

Anyu Zhang<sup>\*, a, b</sup>, Jing Zhang<sup>b</sup>, Ruifeng Zhang<sup>b</sup>, Yun Xue<sup>b</sup>

<sup>a</sup> School of Ecological and Environmental Sciences, East China Normal University, 500 Dongchuan Road, Shanghai, 200241, P.R. China

<sup>b</sup> State Key Laboratory of Estuarine and Coastal Research, East China Normal University, 3663 Zhongshan Road North, Shanghai 200062, P.R. China

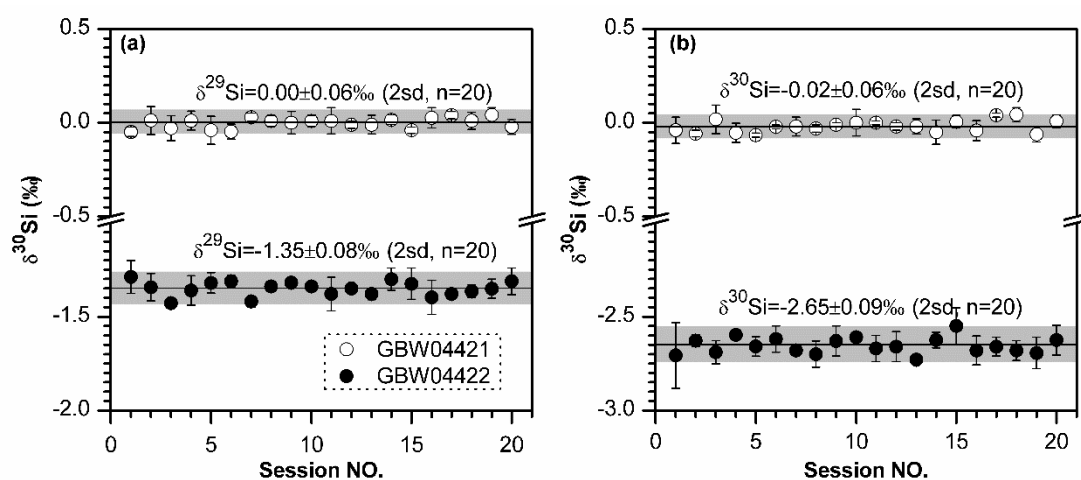

**Figure S1** Long-term measurements of national Si reference materials GBW04421 and GBW04422 relative to NBS28. The solid black lines and grey shadow area denote the average value and 2 standard deviation.
